# Supplementary material
Source: MDPI journal article supplement (https://www.mdpi.com/2079-6412/13/8/1367)
Supplement: s1 [file s1]

# In Situ Decorated Palladium Nanoparticles on Chitosan Beads as a Catalyst for Coupling Reactions

Khaoula Oudghiri <sup>1</sup>, Lahoucine Bahsis <sup>2\*</sup>, Said Eddarir <sup>1</sup>, Hafid Anane <sup>2</sup> and Moha Taourirte <sup>1</sup>

<sup>1</sup> Laboratoire de recherche en développement durable et santé, Faculté des Sciences et Techniques de Marrakech, Université Cadi Ayyad, Marrakech 40000, Morocco; khaoulaoudghiri08@gmail.com (K.O.); eddarir@fstg-marrakech.ac.ma (S.E.) ; m.taourirte@uca.ma (M.T.)

<sup>2</sup> Laboratoire de Chimie Analytique et Moléculaire, LCAM, Faculté Polydisciplinaire de Safi, Université Cadi Ayyad, Safi 46030, Morocco; ananehafid@gmail.com

\* Correspondence: bahsis.lahoucine@gmail.com

## NMR analysis of prepared compound 3a

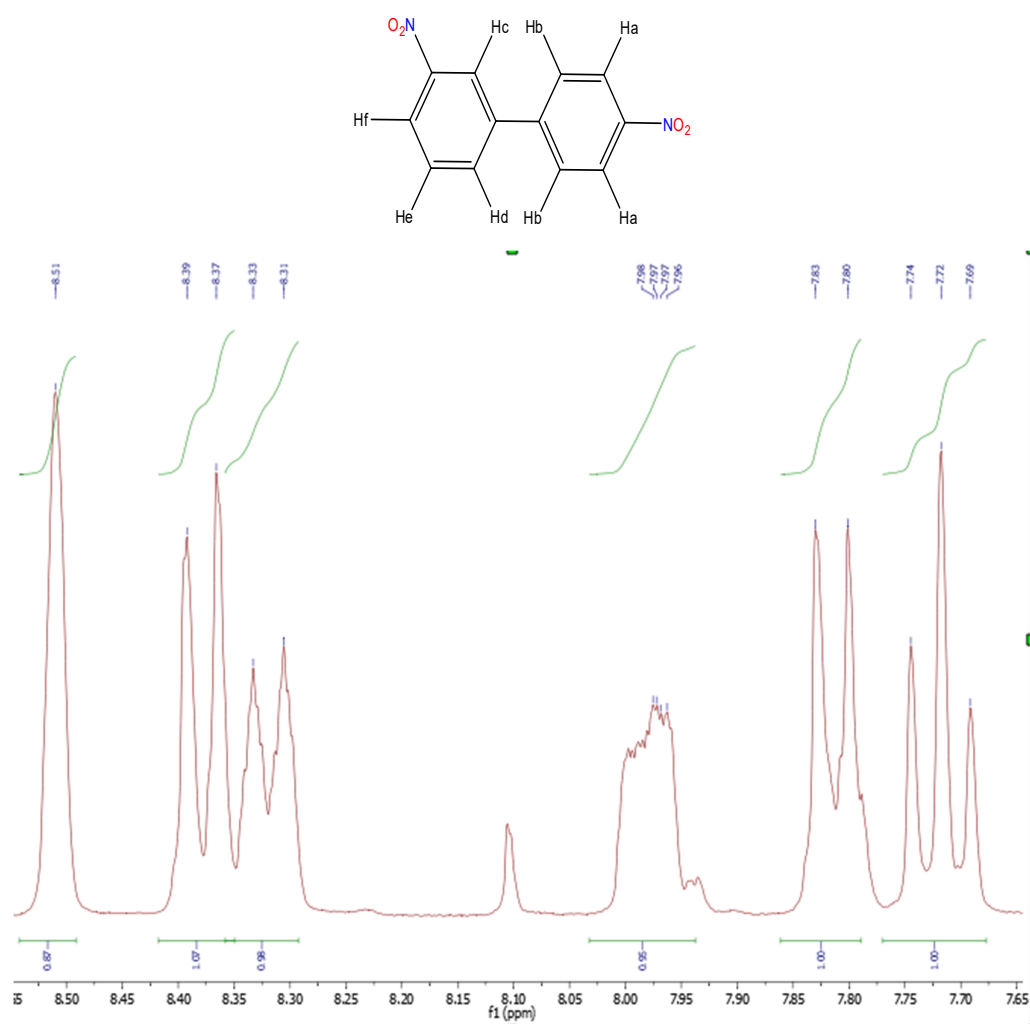

**Figure S1.** <sup>1</sup>H NMR Spectrum of compound 3a

Yellow solid, mp 134-136 °C, yield: **91%**, <sup>1</sup>H NMR (300 MHz, CDCl<sub>3</sub>) (δ ppm) :

8.51 ( s ; 1H ; Hc), 8.37 (d; 3J<sub>Ha-Hb</sub> = 9 Hz ; 2H ; Ha), 8.32 ( d ; 3J<sub>Hf-He</sub> = 9 Hz ; 1H ; Hf),  
 7.98 ( d ; 3J<sub>Hd-He</sub> = 9 Hz ; 1H ; Hd), 7.81 ( d ; 3J<sub>Hb-Ha</sub> = 9Hz ; 2H ; Hb ), 7.72 ( t ; 3J<sub>He-Hd</sub> = 9  
 Hz ; 3J<sub>He-Hd</sub> = 15 Hz ; 1H ; He).

## NMR analysis of prepared compound **3b**

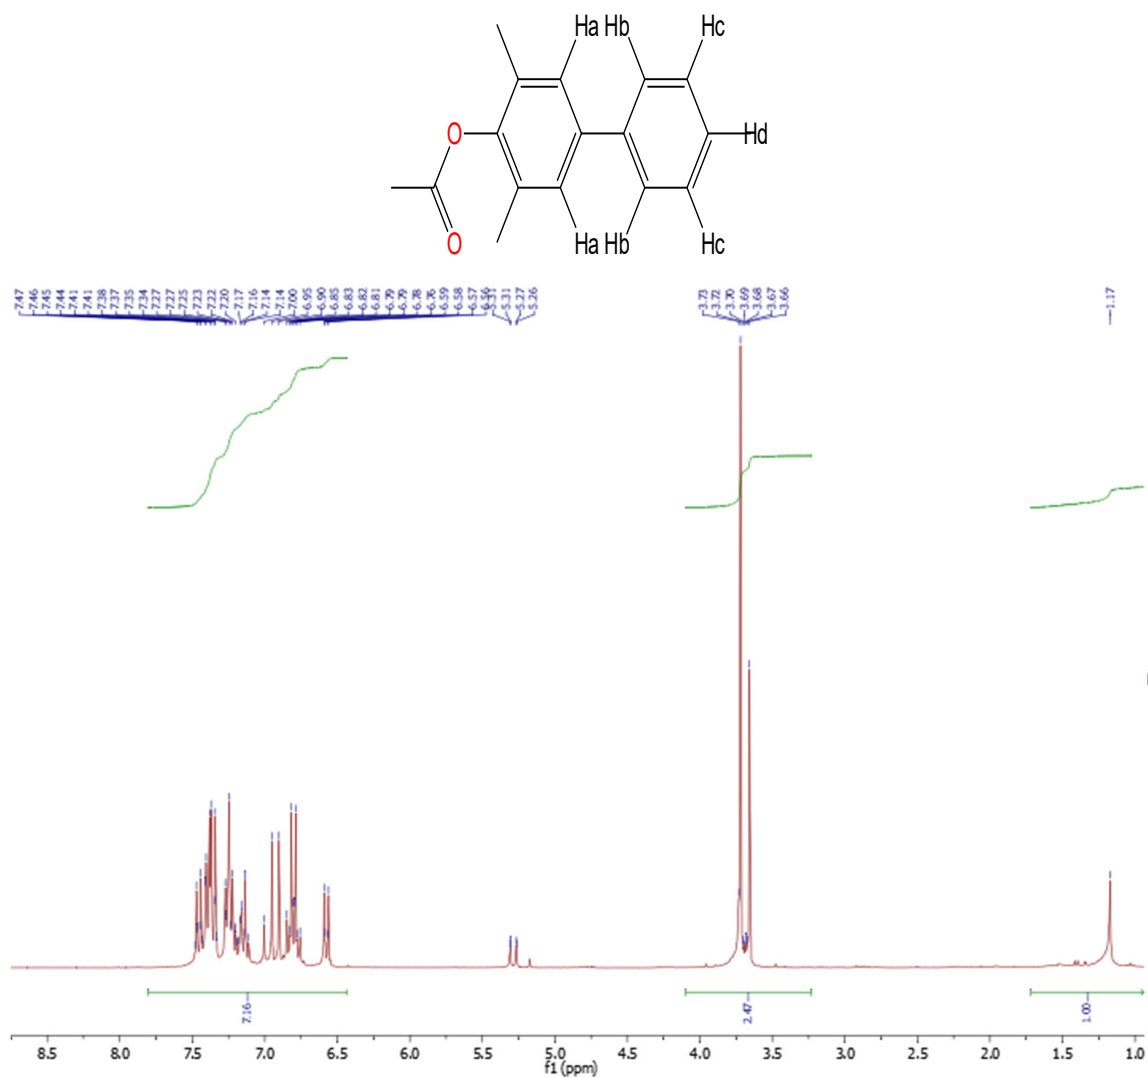

**Figure S2.** <sup>1</sup>H NMR Spectrum of compound **3b**

Yellow solide, mp 122-123 °C, yield : **84%**, <sup>1</sup>H NMR (300 MHz, CDCl<sub>3</sub>) (δ ppm): 1.17-3.69 (s; 9H), 7.19 (d; <sup>3</sup>J<sub>Hd-Hc</sub> = 7.5 Hz; Hb), 7.29 (dd; <sup>3</sup>J<sub>Hc-Hb</sub> = 7.3 Hz; 1Hc), 7.5 (d; <sup>3</sup>J<sub>Hc-Hd</sub> = 8.75 Hz; Hd).

# NMR analysis of prepared compound **3c**

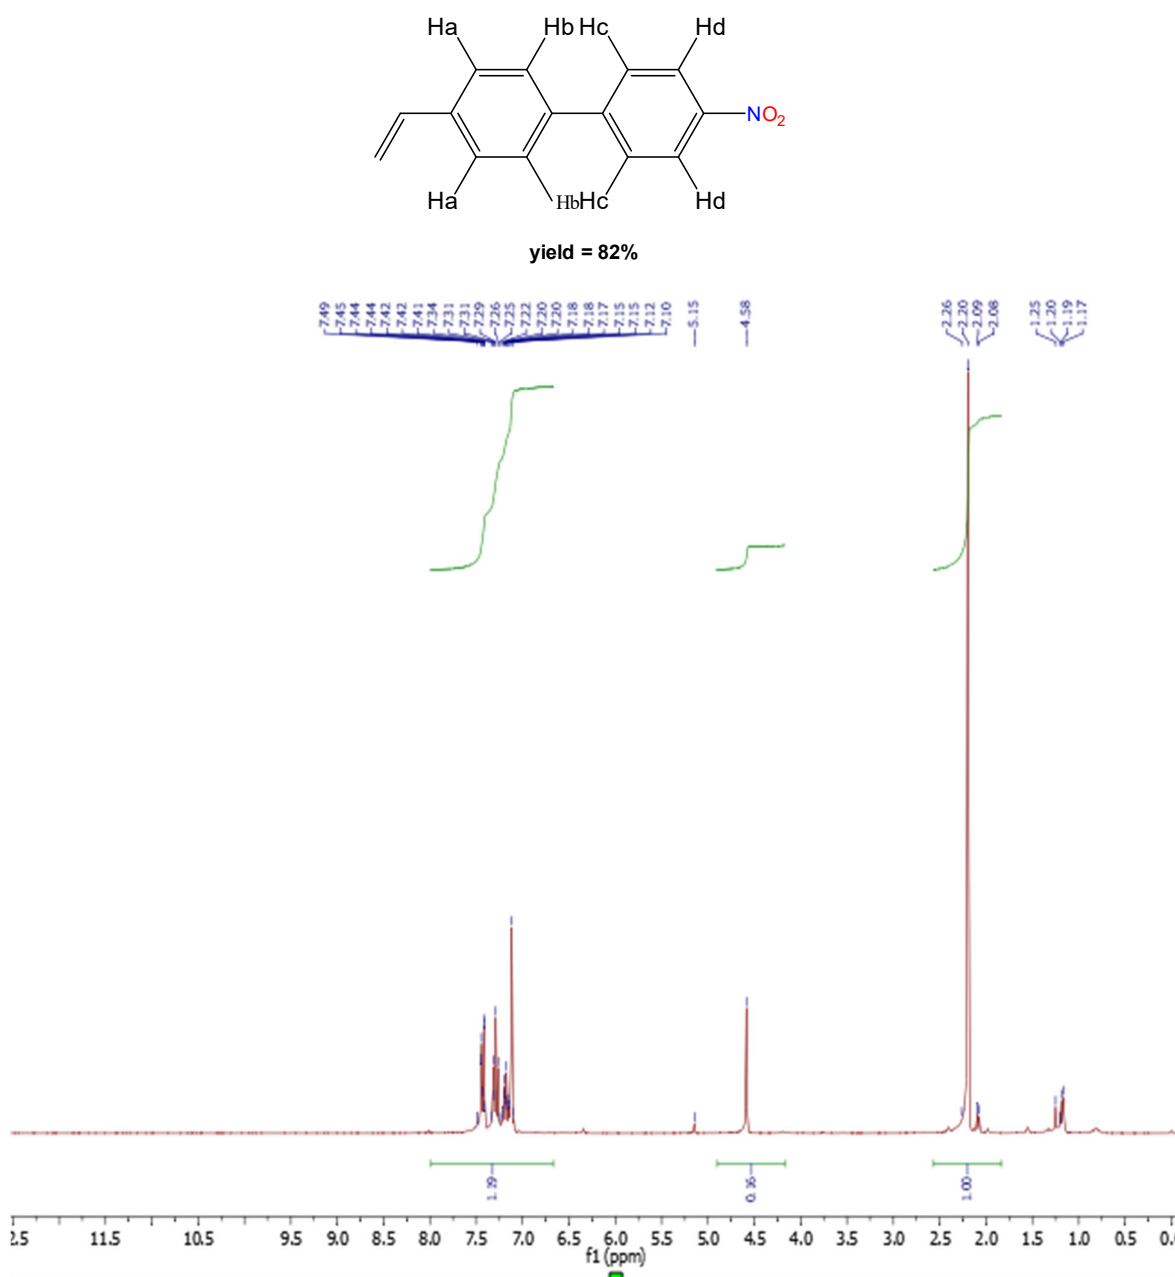

**Figure S3.** <sup>1</sup>H NMR Spectrum of compound **3c**

Yellow solid, mp 109-110 °C ,yield : **82%**, <sup>1</sup>H NMR (300 MHz, CDCl<sub>3</sub>) (δ ppm) : 3.66 ( s ; 2H ), 6.58 (d; 3J<sub>Ha-Hb</sub> =8.9 Hz ; 2H ; Hd), 6.77 ( d ; 3J<sub>Hf-He</sub> = 6.5 Hz ; 1H ; Hb ), 6.84 ( d ; 3J<sub>Hd-He</sub> = 6.5Hz ; 1H ; Ha),7.46 (d ; 3J<sub>He-Hd</sub>= 9 Hz ; 2Hc).

## NMR analysis of prepared compound 3d

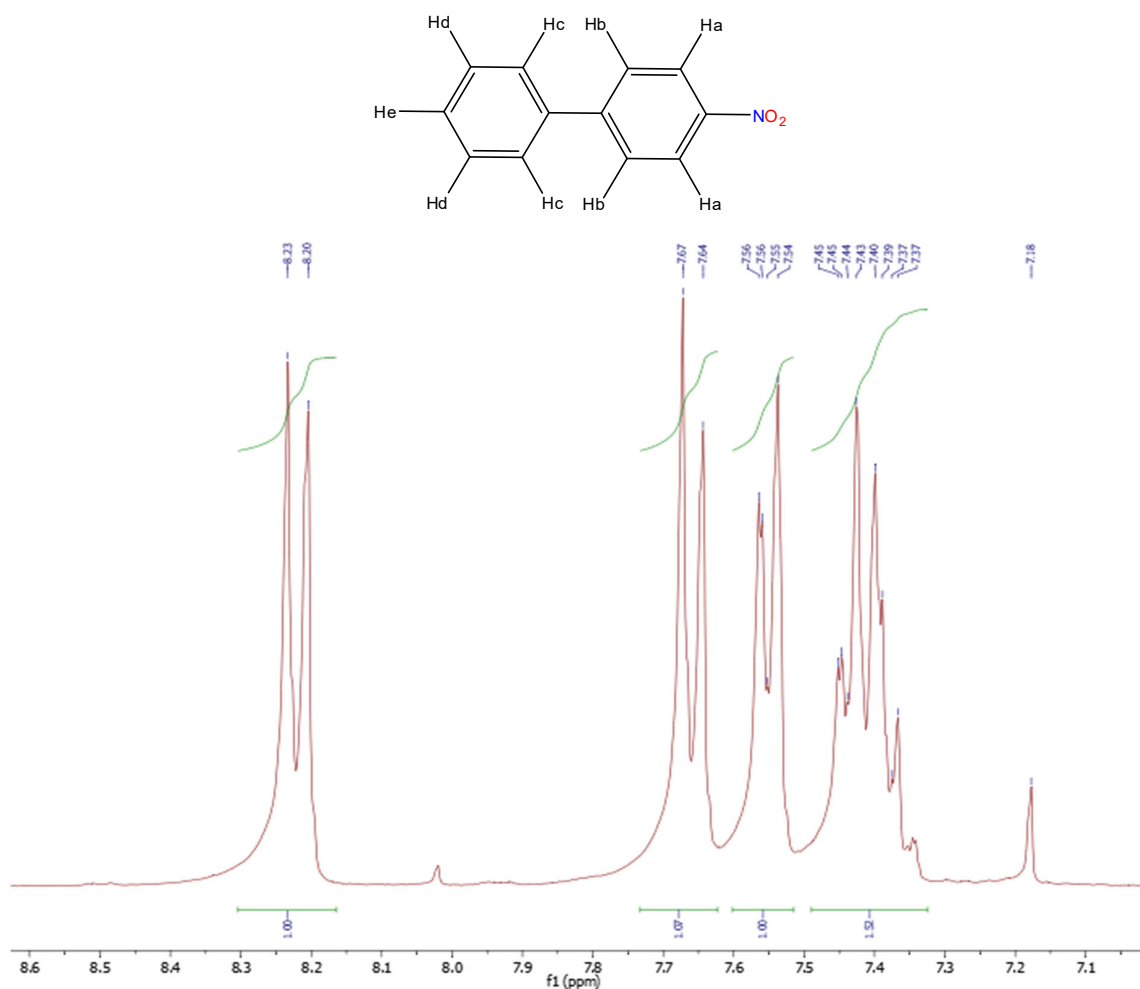

**Figure S4.** <sup>1</sup>H NMR Spectrum of compound 3d

Yellow solid, mp 112-113 °C, yield : **58%**, <sup>1</sup>H NMR (300 MHz, CDCl<sub>3</sub>) (δ ppm) : 8.22 (d ;  $3J_{\text{Ha-Hb}} = 9 \text{ Hz}$  ; 2H ; Ha), 7.66 (d ;  $3J_{\text{Hb-Ha}} = 9 \text{ Hz}$  ; 2H ; Hb), 7.55 (d ;  $3J_{\text{Hc-Hd}} = 9 \text{ Hz}$  ; 2H ; Hc), 7.41 (m ; Hd and He, 3H).

## NMR analysis of prepared compound 3e

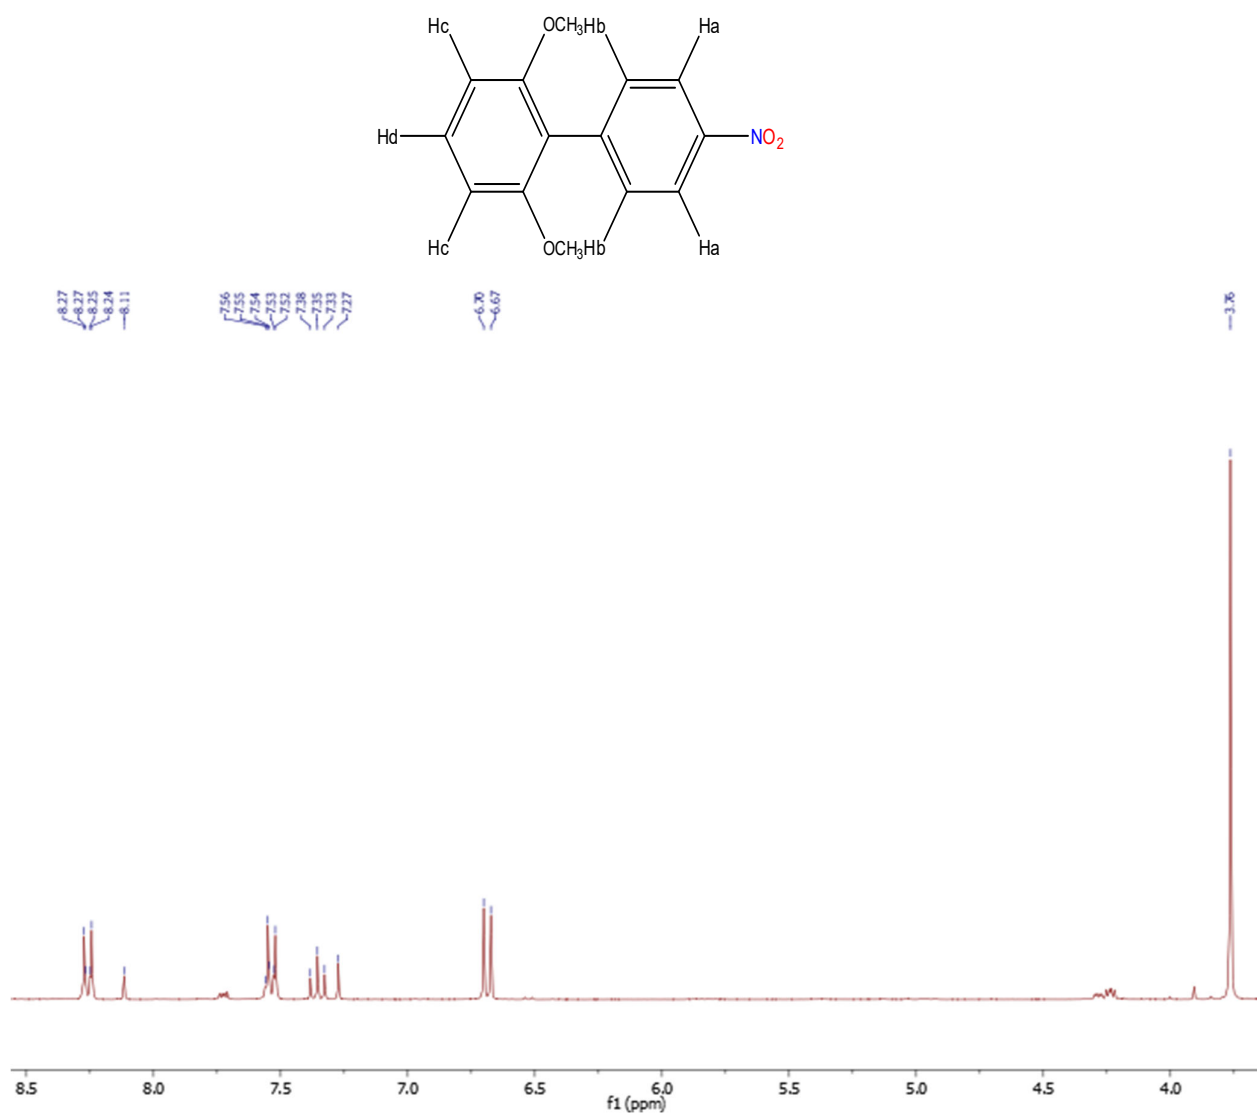

**Figure S5.** <sup>1</sup>H NMR Spectrum of compound 3e

Pale yellow powder, mp 132-133 °C, yield : **66%**, <sup>1</sup>H NMR (300 MHz, CDCl<sub>3</sub>) (δ ppm) : 8.26 (d; 3J<sub>Ha-Hb</sub> = 9 Hz ; 2H ; H<sub>a</sub>), 7.54 (d ; 3J<sub>Hb-Ha</sub> = 9 Hz ; 2H ; H<sub>b</sub>), 7.35 ( t ; 3J<sub>Hd-Hc</sub>= 9 Hz ; 3J<sub>Hd-Hc</sub>= 15 Hz ; 1H ; H<sub>d</sub> ) , 6.68 (d ; 3J<sub>Hc-Hd</sub>= 9 Hz ; 2H ; H<sub>c</sub>), 3.76 ( s ; 6H ).

## NMR analysis of prepared compound 3f

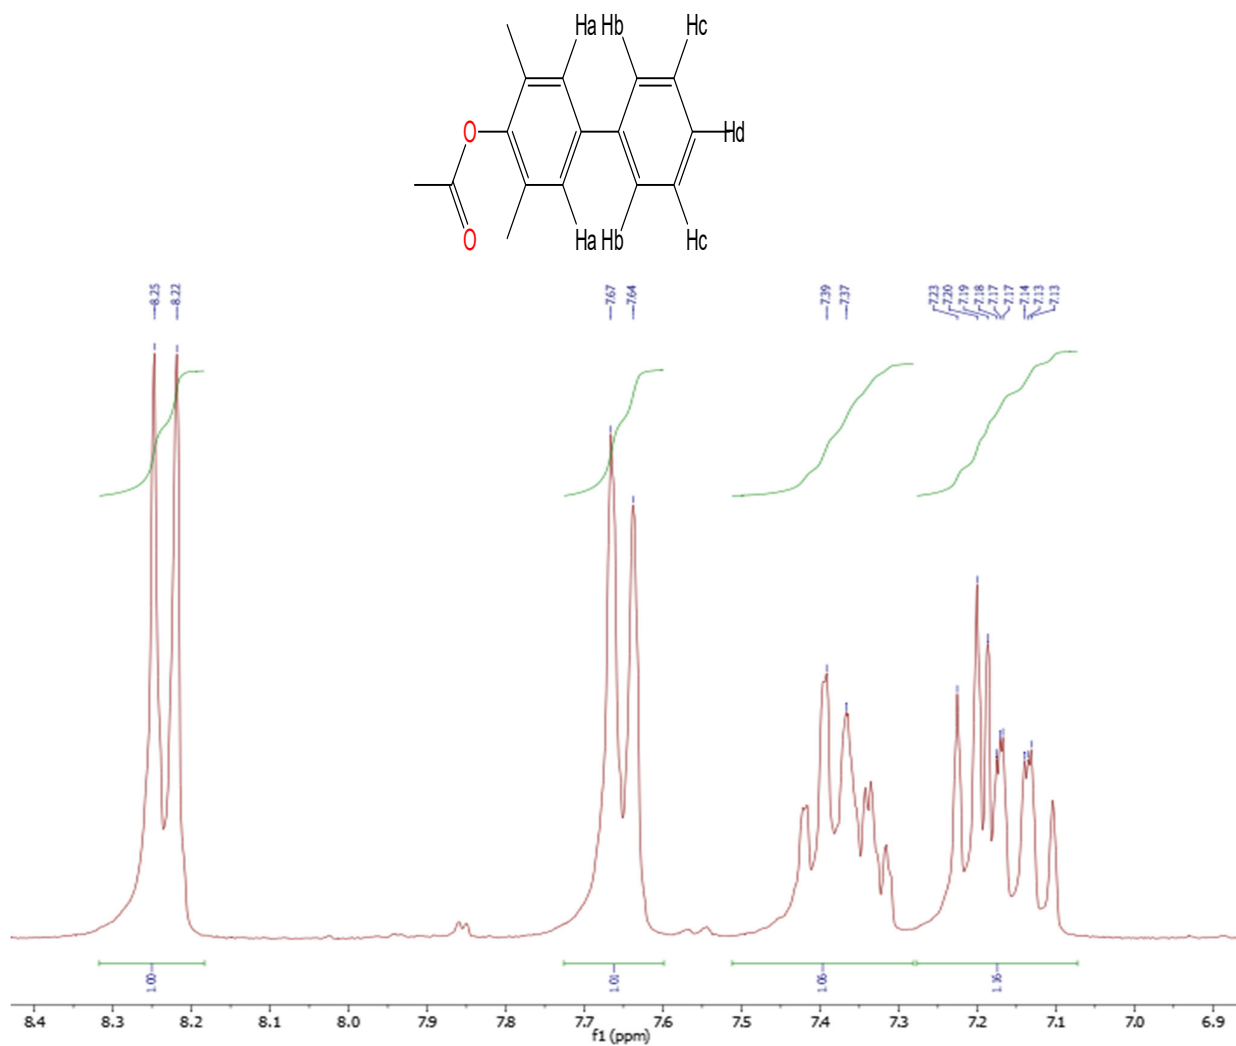

**Figure S6.**  $^1\text{H}$  NMR Spectrum of compound 3f

Yellow powder, mp 114-115 °C, yield : 44%,  $^1\text{H}$  NMR (300 MHz,  $\text{CDCl}_3$ ) ( $\delta$  ppm) 8.22 (d ;  $3J_{\text{Ha-Hb}} = 9$  Hz ; 2H ; Ha), 7.65 (d ;  $3J_{\text{Hb-Ha}} = 9$  Hz ; 2H ; Hb), 7.37 (m ; F, He and Hf ; 2H ; F), 7.16 (m ; Hc, Hd and Hf, 3H).

## NMR analysis of prepared compound 5a

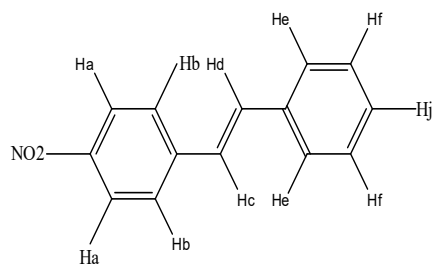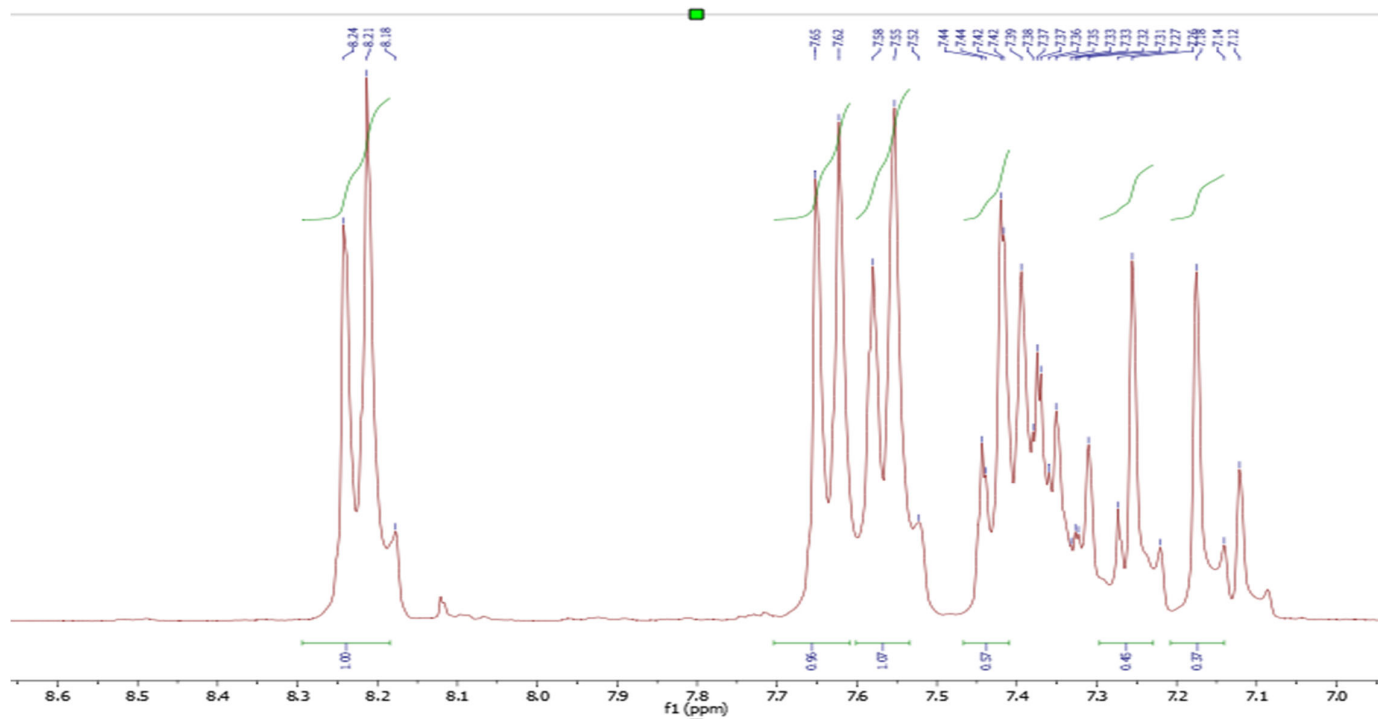

**Figure S7.**  $^1\text{H}$  NMR Spectrum of compound **5a**

Yellow solid, mp 156-157 °C, yield: **82%**,  $^1\text{H}$  NMR (300 MHz,  $\text{CDCl}_3$ ) ( $\delta$  ppm) : 8.14 (d;  $3J_{\text{Ha-Hb}} = 9$  Hz ; 2H ; Hd), 7.55 (d;  $3J_{\text{Hb-Ha}} = 9$  Hz ; 2H ; Hb) , 7.47 ( d ;  $3J_{\text{He-Hf}} = 9$  Hz ; 2H ; He) , 7.30 ( m ; 3H ; 2Hf , Hg ) , 7.20 ( d ;  $3J_{\text{Hc-Hd}} = 16.5$  ; 1 H ; Hc), 7.07 ( d ;  $3J_{\text{Hd-Hc}} = 16.5$  Hz ; 1H ; Hd), 5.28 ( d ;  $3J_{\text{He-Hg}} = 10.8$  Hz ; 2H ; He).



## NMR analysis of prepared compound 5b

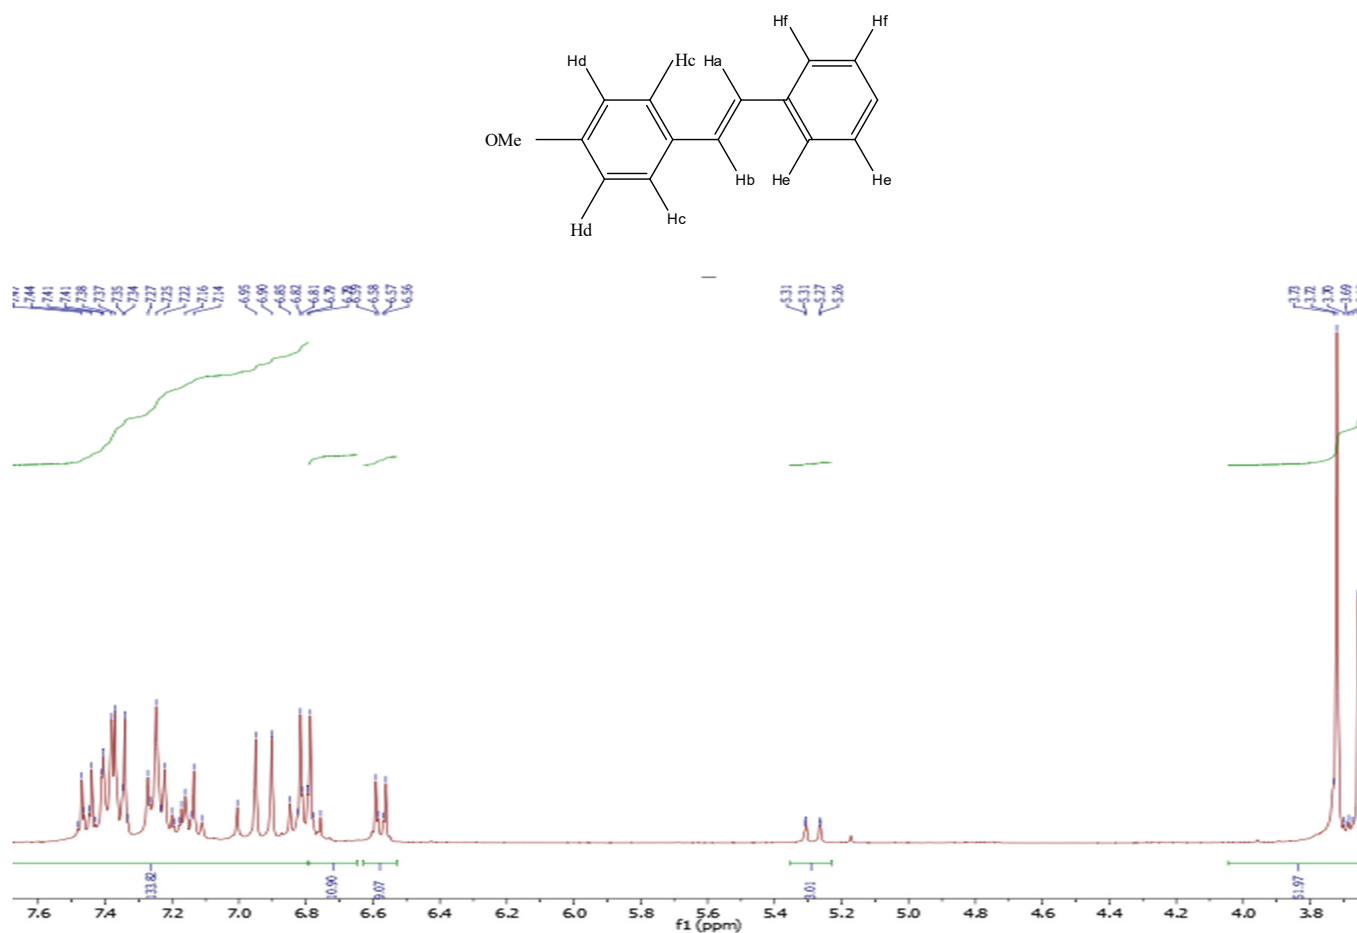

**Figure S8.**  $^1\text{H}$  NMR Spectrum of compound **5b**. White solid, mp 136-137°C, yield: 90%,  $^1\text{H}$  NMR (300 MHz,  $\text{CDCl}_3$ ) ( $\delta$  ppm) : 3.66 (s ; 3H), 6.58 (d;  $3J_{\text{Hb-Ha}} = 9$  Hz ; Hd) , 6.77 ( d ;  $3J_{\text{He-Hf}} = 9$  Hz ; Hb) , 6.84 ( d ;  $3J_{\text{Hb-Ha}} = 6.5$  Hz; Ha ) , 7.10-7.16 ( m ;  $3J_{\text{Hc-Hd}} = 16.5$  ; 3Hf ) , 7.39 ( d ;  $3J_{\text{Hd-Hc}} = 7.6$  Hz ; 2He) , 7.46 ( d ;  $3J_{\text{He-Hf}} = 9$  Hz ; 2Hc).

## NMR analysis of prepared compound 5c

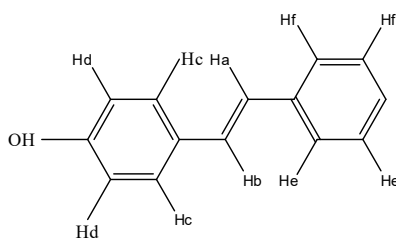

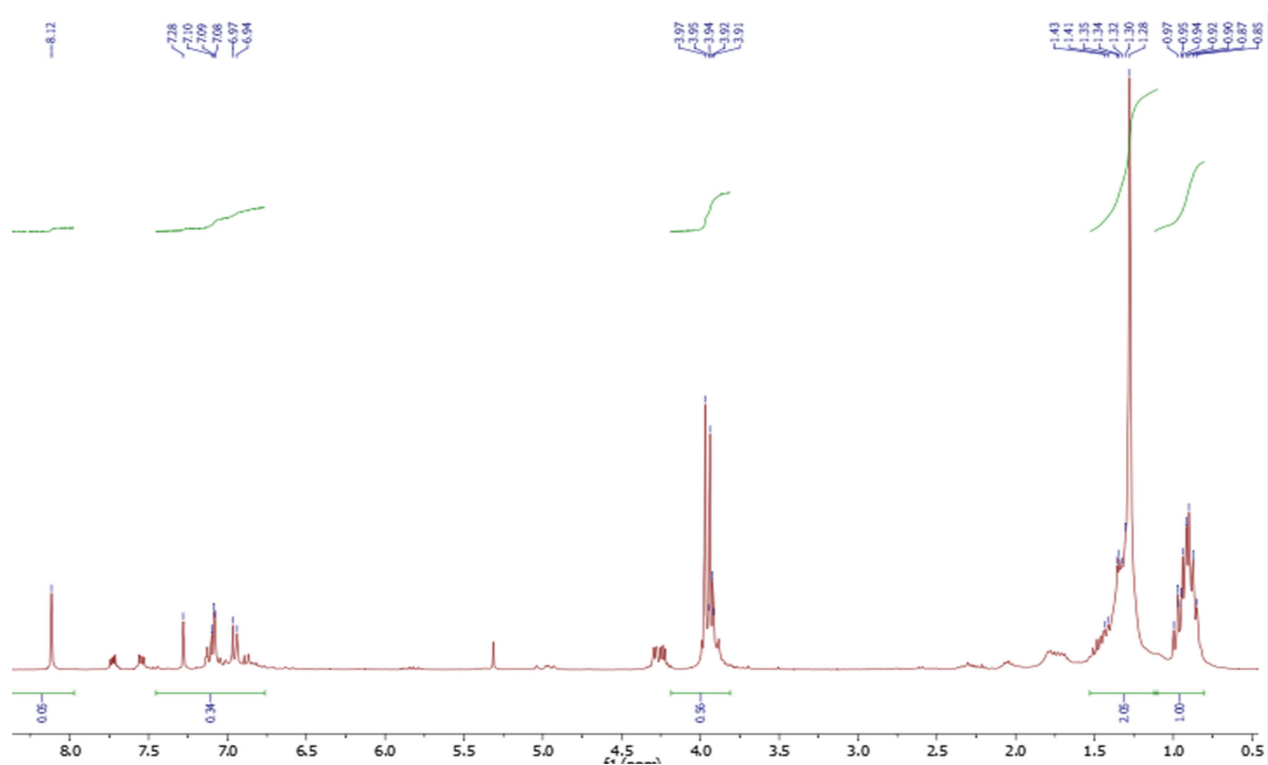

**Figure S9.**  $^1\text{H}$  NMR Spectrum of compound **5c**

White solid, mp 132-133 °C, yield: **76%**,  $^1\text{H}$  NMR (300 MHz,  $\text{CDCl}_3$ ) ( $\delta$  ppm) : 1.28 (s ; 3H), 3.92 (d;  $3J_{\text{Hb-Ha}} = 9$  Hz ; Hd) , 3.95 ( d ;  $3J_{\text{He-Hf}} = 9$  Hz ; Hb) , 6.84 ( d ;  $3J_{\text{Hb-Ha}} = 6.5$  Hz; Ha ) , 6.94-7.28( m ;  $3J_{\text{Hc-Hd}} = 16.5$  ; 3Hf ) , 8.12 ( S;  $3J_{\text{He-Hj}} = 9$  Hz ; 2Hc).
